# Supplementary material for: Real-Time Optical Mapping of Contracting Cardiac Tissues With GPU-Accelerated Numerical Motion Tracking
Source: PubMed Central journal article supplement (PMC9172765; doi:10.3389/fcvm.2022.787627), 2022-05-24
Supplement: Data_Sheet_1.pdf [file Data_Sheet_1.pdf]

## Supplementary Material

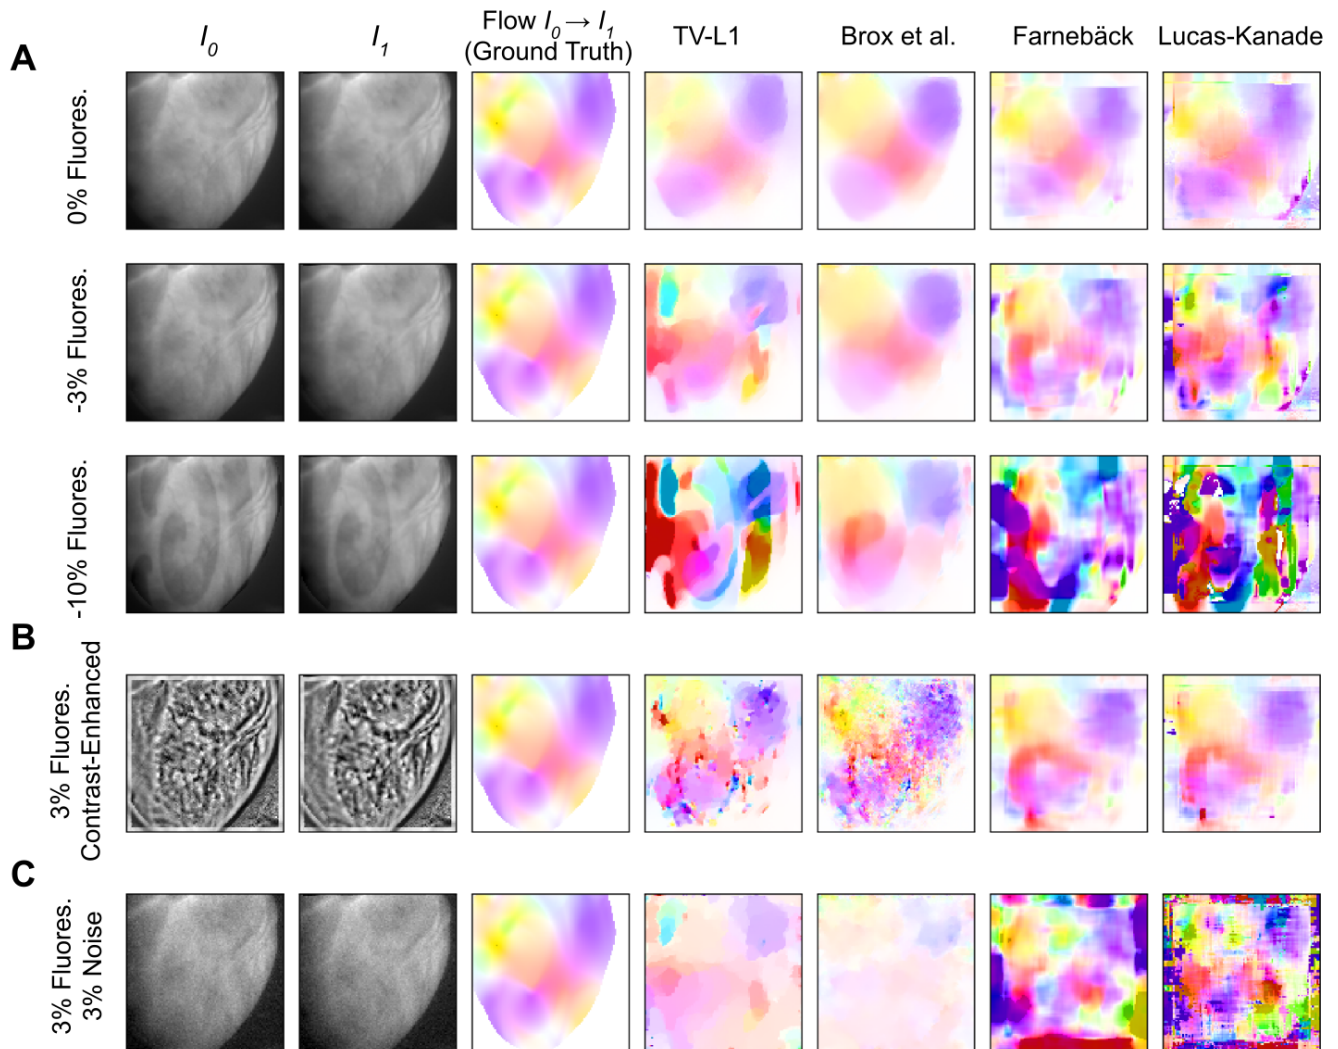

**Figure S1.** Accuracy of GPU-based motion tracking algorithms applied to synthetic voltage-sensitive optical mapping data. The synthetic data consists of video image pairs showing the tissue in two different deformed states ( $I_0$  and  $I_1$ ), and dense 2D displacement data describing the deformation between the two images. In addition, the synthetic video images contain action potential wave patterns, which cause a local decrease in fluorescence strength ( $-\Delta F/F$ ). The ground truth displacements and tracking outcome are color-coded (orientation and magnitude). **A)** Tracking accuracy with original video images with 0%, 3% and 10% fluorescence signal strength, respectively. The increasing fluorescent signal causes tracking artifacts, particularly with the TV-L1 and Lucas Kanade algorithms. **B)** Tracking accuracy with contrast-enhanced video images with 3% fluorescence signal strength. The contrast-enhancement reduces tracking artifacts with all algorithms. However, with the TV-L1 and Brox algorithms the contrast-enhancement generates noisy tracking results. **C)** Tracking accuracy with original video images with 3% noise and 3% fluorescence signal strength.

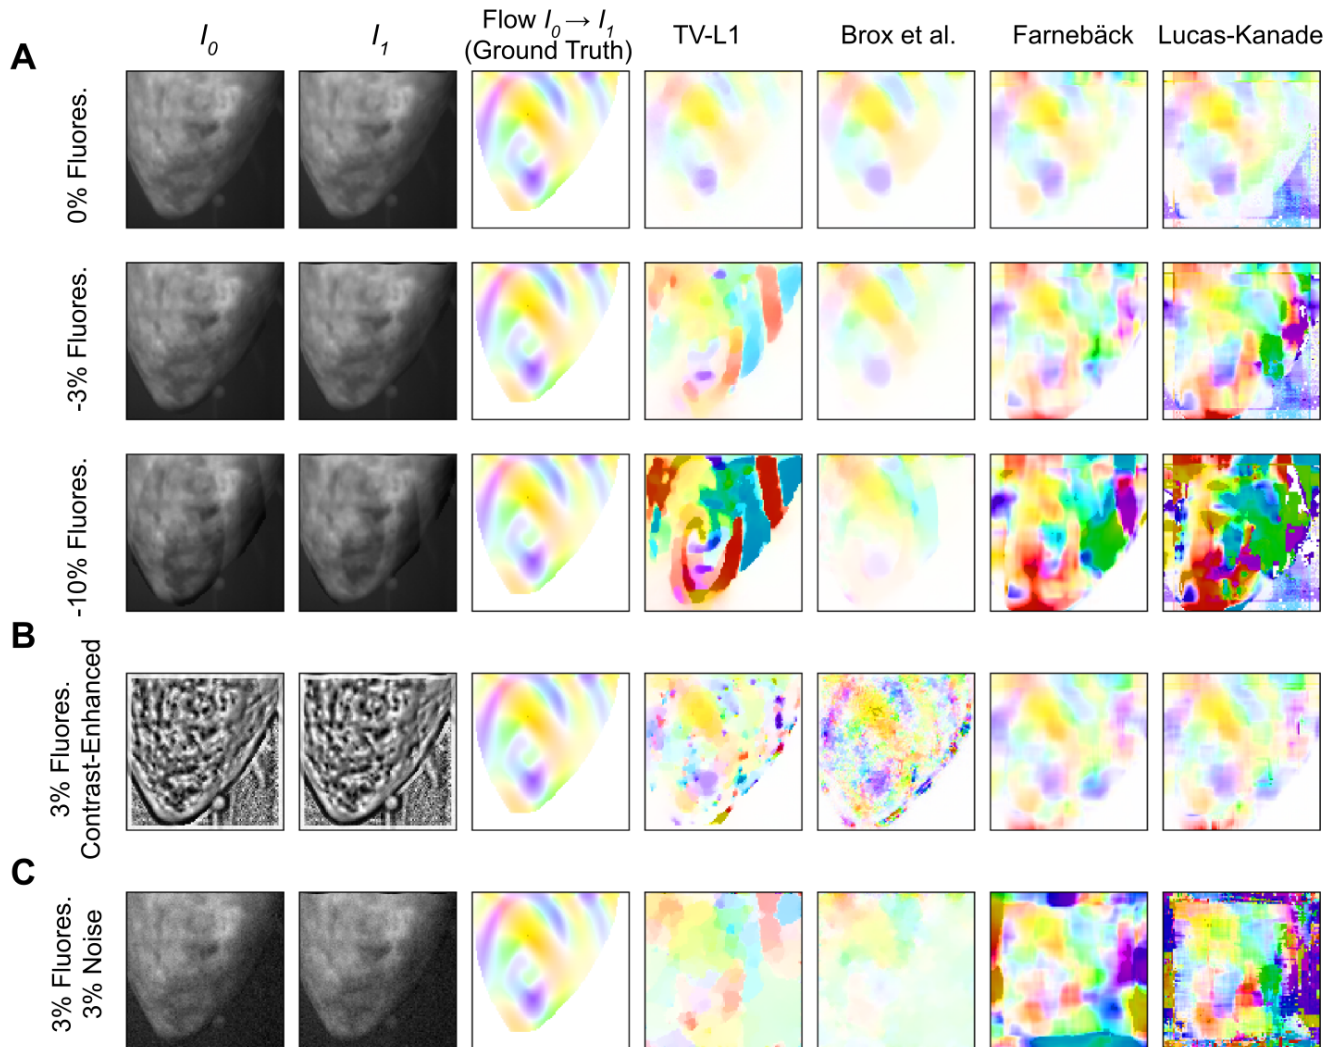

**Figure S2.** Accuracy of GPU-based motion tracking algorithms applied to synthetic voltage-sensitive optical mapping data. The synthetic data consists of video image pairs showing the tissue in two different deformed states ( $I_0$  and  $I_1$ ), and dense 2D displacement data describing the deformation between the two images. In addition, the synthetic video images contain action potential wave patterns, which cause a local decrease in fluorescence strength ( $-\Delta F/F$ ). The ground truth displacements and tracking outcome are color-coded (orientation and magnitude). **A)** Tracking accuracy with original video images with 0%, 3% and 10% fluorescence signal strength, respectively. The increasing fluorescent signal causes tracking artifacts, particularly with the TV-L1 and Lucas Kanade algorithms. **B)** Tracking accuracy with contrast-enhanced video images with 3% fluorescence signal strength. The contrast-enhancement reduces tracking artifacts with all algorithms. However, with the TV-L1 and Brox algorithms the contrast-enhancement generates noisy tracking results. **C)** Tracking accuracy with original video images with 3% noise and 3% fluorescence signal strength.

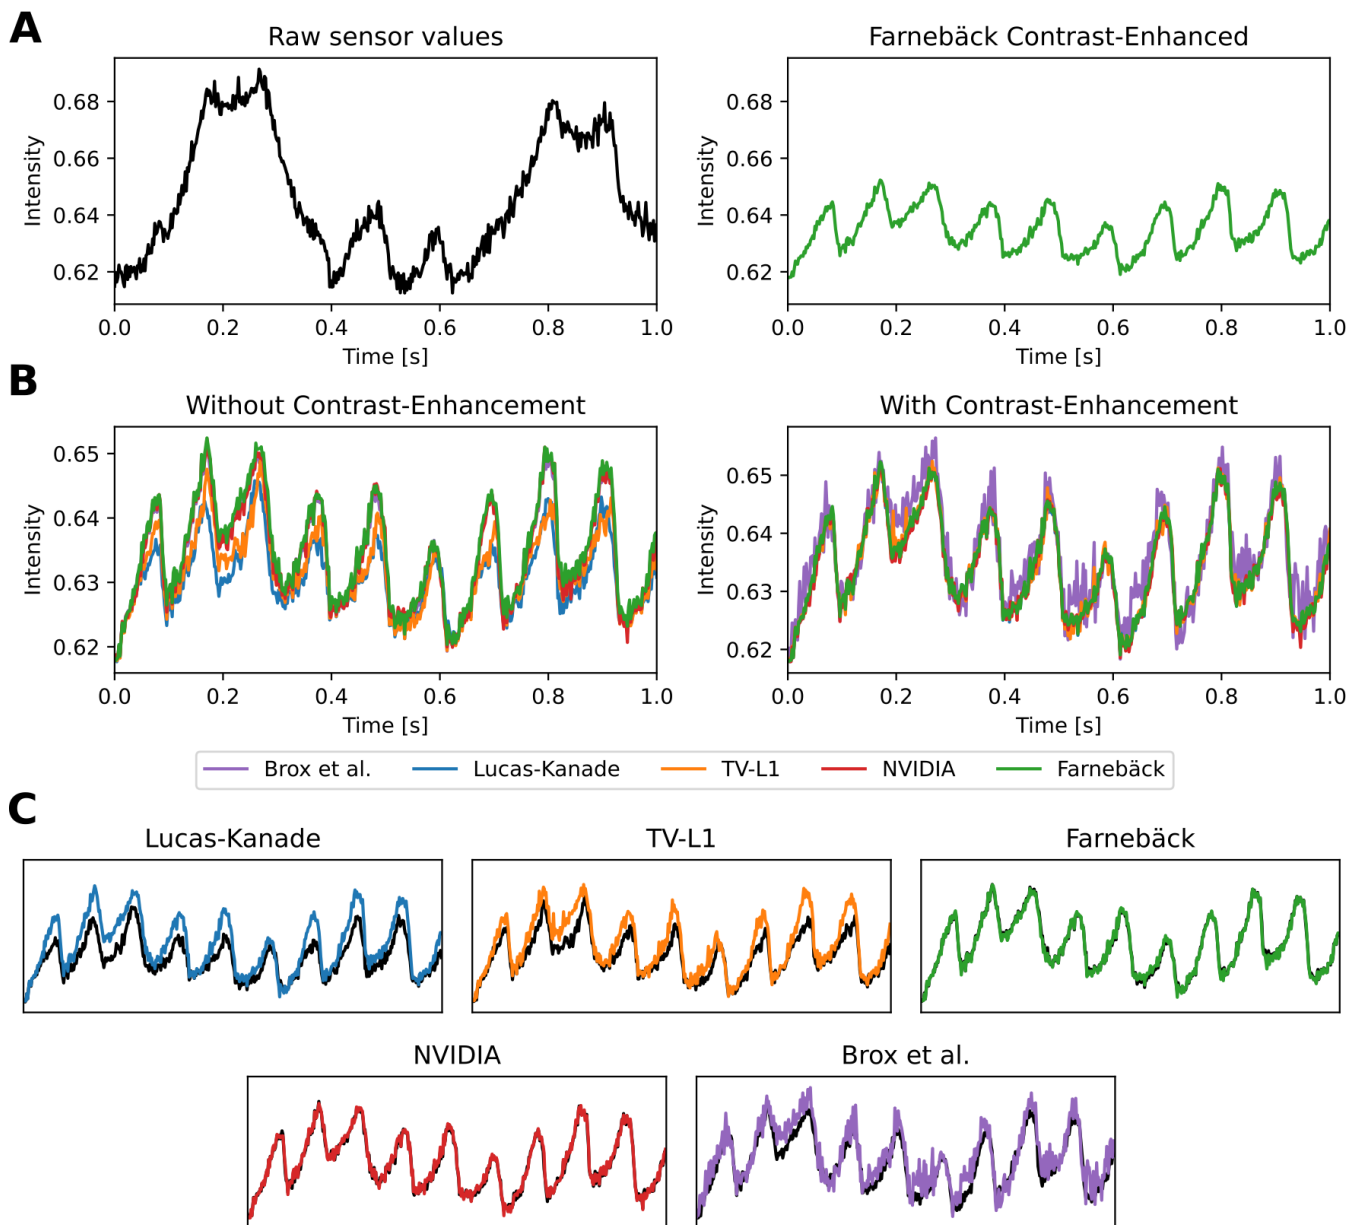

**Figure S3.** Optical traces obtained from contracting heart surface in voltage-sensitive optical mapping recordings of ventricular fibrillation before and after numerical motion tracking with 5 different GPU-accelerated motion tracking algorithms (Lucas-Kanade, TV-L1, Farneback, NVIDIA, Brox). **A**) Left: Raw optical trace (black) obtained without numerical motion tracking exhibiting substantial motion artifacts. Right: Optical trace after numerical motion tracking using Farneback GPU algorithm and motion-stabilization exhibiting a series of action potentials (downstrokes correspond to action potential upstrokes). **B**) Comparison of numerical motion-stabilization using different GPU algorithms. Left: without contrast-enhancement. Right: with contrast-enhancement. Without contrast-enhancement most of the algorithms perform less accurately. With contrast-enhancement all algorithms provide similar and sufficiently accurate results. **C**) Individual comparison of performance of tracking algorithms and resulting motion-stabilization when tracking videos with contrast-enhancement (color) and without (black).

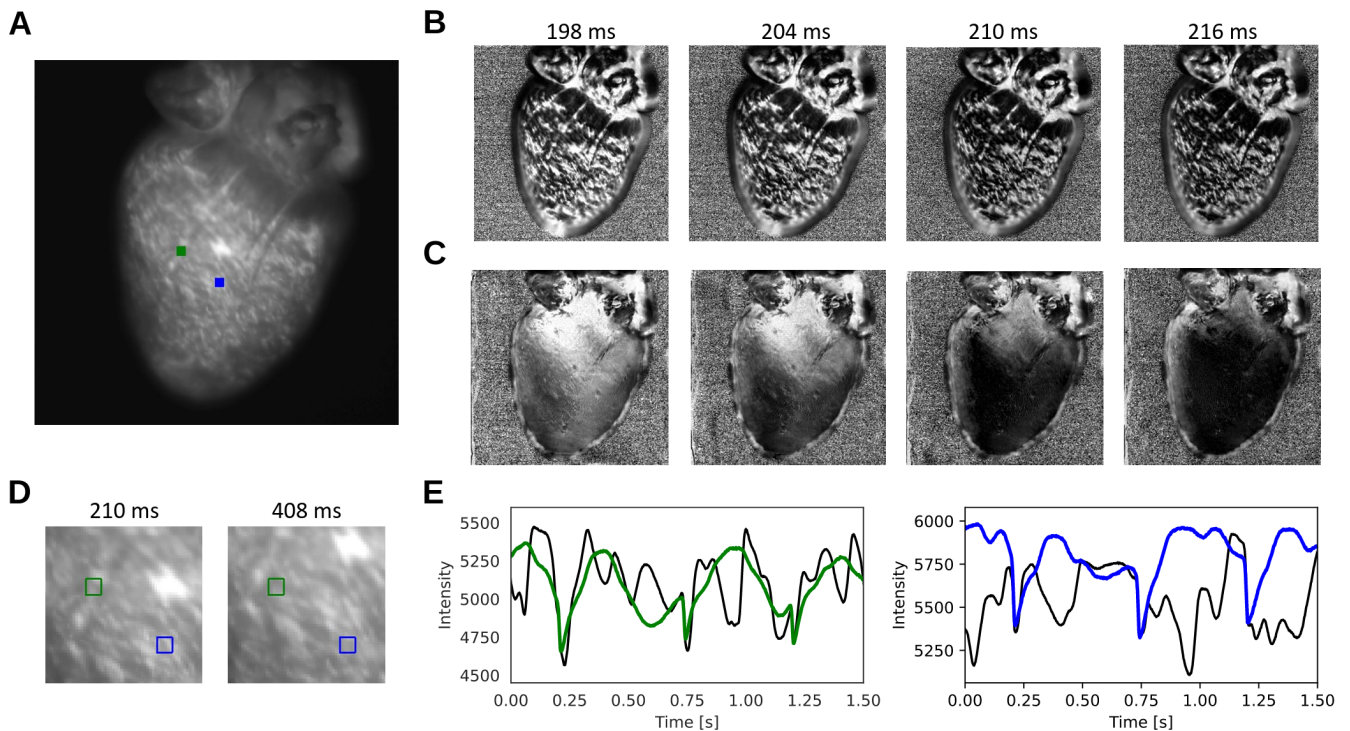

**Figure S4.** Numerical motion tracking and motion artifact compensation performed with Farnebäck GPU motion tracking algorithm with optical mapping video of rabbit heart during sinus rhythm recorded with a Brainvision Scimedia MiCAM N256 camera with voltage sensitive-staining (Di-4-ANEPPS), see also Supplementary Video 9. **A**) Cropped video image ( $200 \times 200$  pixels) from original recording (500fps,  $256 \times 256$  pixels). ROI (green and blue,  $6 \times 6$  pixels) used to extract optical traces shown in **E**. **B**) Motion and deformation of heart surface around ROIs shown in **A**) over time ( $50 \times 50$  pixels). **C**) Pixel-wise normalized video without numerical motion compensation and with motion artifacts. **D**) Pixel-wise normalized video after numerical motion tracking and compensation and with significantly reduced motion artifacts. The action potential wave is visible as a dark wave. **E**) Optical traces obtained from videos before (black) and after (green and blue) motion tracking and artifact compensation. Traces averaged over the two rectangular regions shown in **A**).

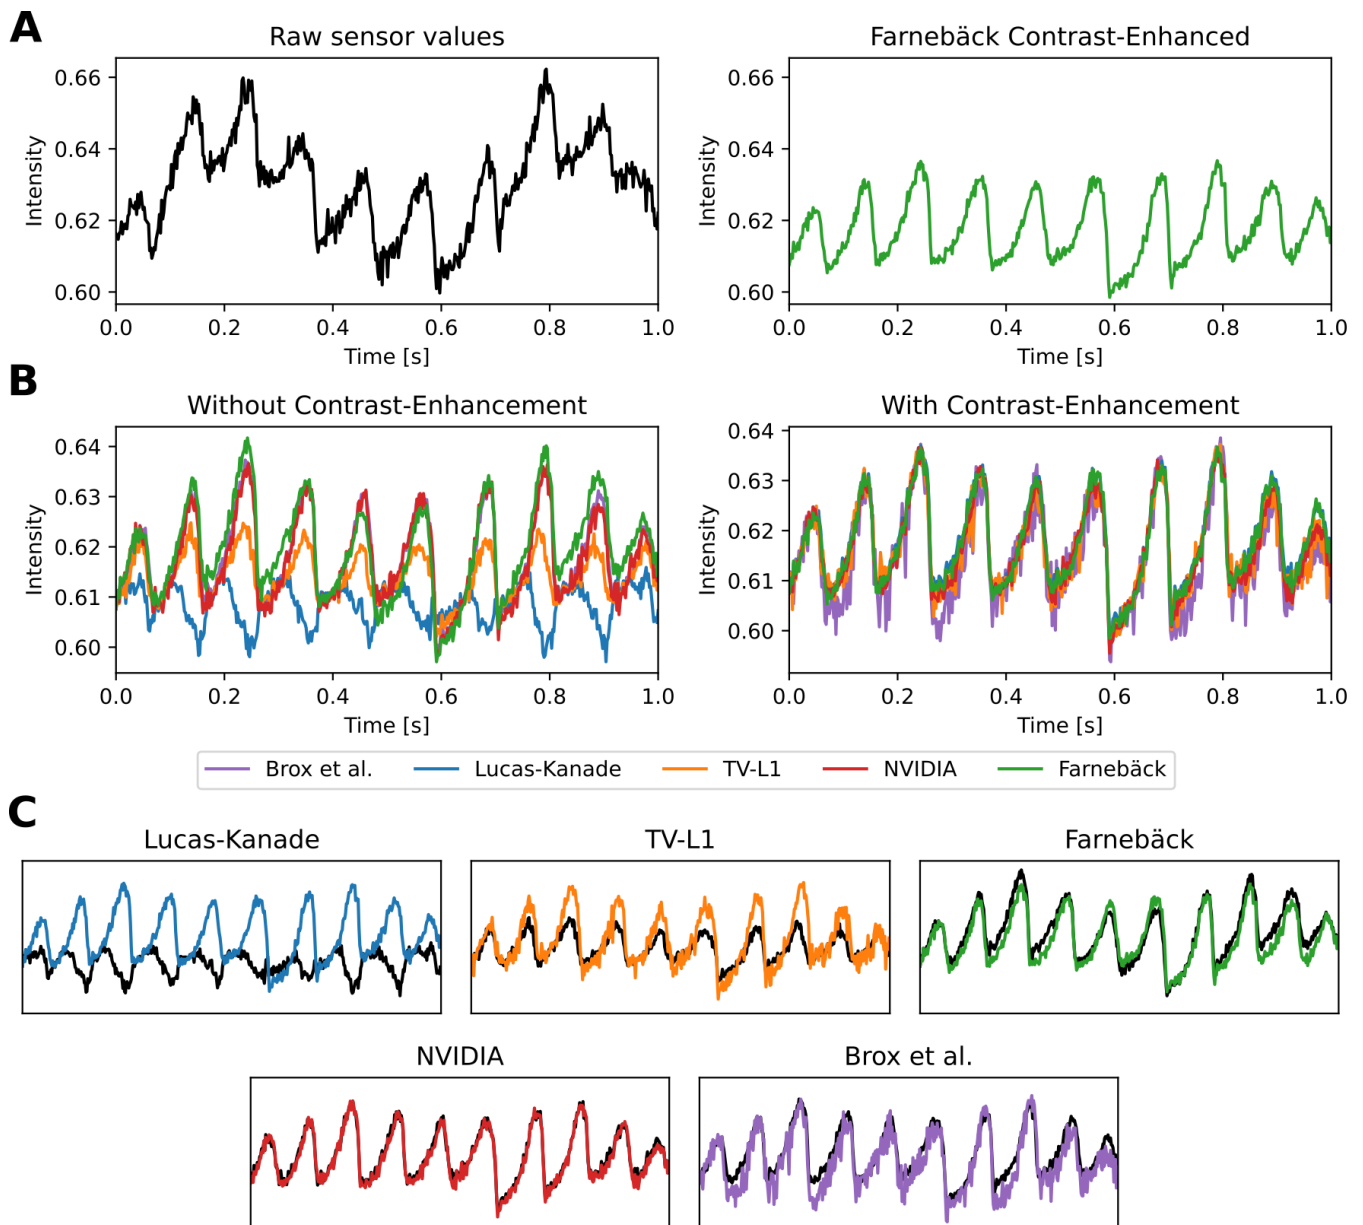

**Figure S5.** Optical traces obtained from contracting heart surface in voltage-sensitive optical mapping recordings of ventricular fibrillation before and after numerical motion tracking with 5 different GPU-accelerated motion tracking algorithms (Lucas-Kanade, TV-L1, Farneback, NVIDIA, Brox). **A**) Left: Raw optical trace (black) obtained without numerical motion tracking exhibiting substantial motion artifacts. Right: Optical trace after numerical motion tracking using Farneback GPU algorithm and motion-stabilization exhibiting a series of action potentials (downstrokes correspond to action potential upstrokes). **B**) Comparison of numerical motion-stabilization using different GPU algorithms. Left: without contrast-enhancement. Right: with contrast-enhancement. Without contrast-enhancement most of the algorithms perform less accurately. With contrast-enhancement all algorithms provide similar and sufficiently accurate results. **C**) Individual comparison of performance of tracking algorithms and resulting motion-stabilization when tracking videos with contrast-enhancement (color) and without (black).

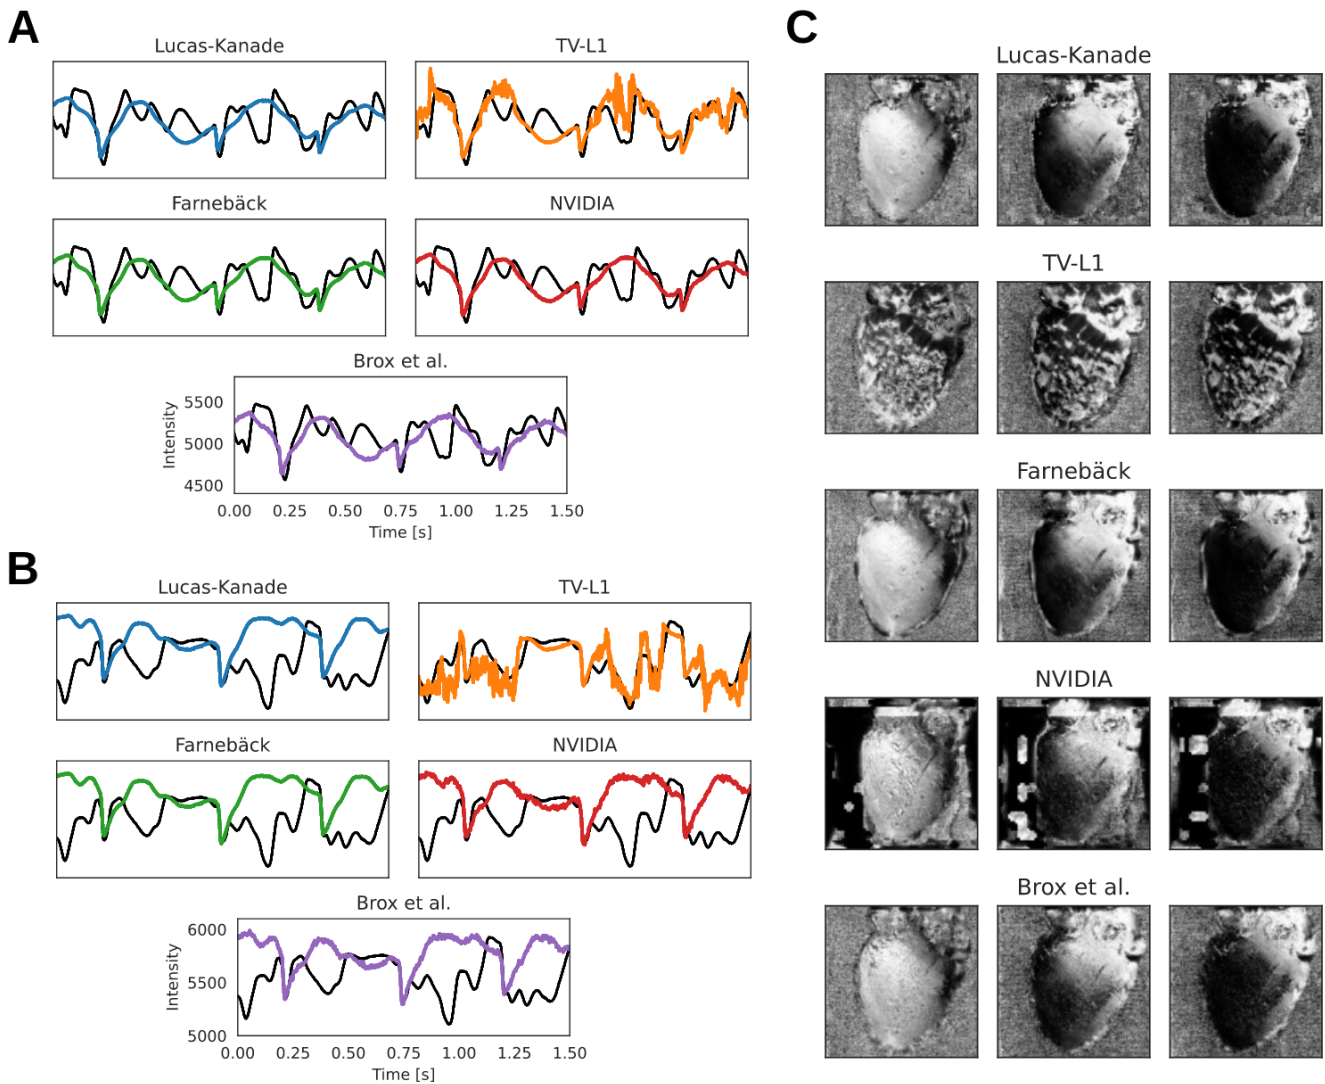

**Figure S6.** Comparison of motion-stabilized optical traces and optical maps obtained with 5 different GPU-based motion tracking algorithms imaging a beating rabbit heart during sinus rhythm with a Brainvision Scimedia MiCAM N256 camera and voltage-sensitive fluorescent dye (Di-4-ANEPPS), see also Fig. S4 and Supplementary Video 9. **A)** Optical traces obtained from the left (green) site shown in Fig. S4A,D), before (black) and after (colored) motion tracking and artifact compensation, c.f. left (green) trace in E). Residual illumination-related motion artifacts **B)** Optical traces obtained from the right (blue) site shown in Fig. S4A,D), before (black) and after (colored) motion tracking and artifact compensation, c.f. right (blue) trace in E). **C)** Optical maps (pixel-wise normalized) showing effectiveness and ineffectiveness of different algorithms in producing motion-stabilized videos. With some algorithms, the action potential waves are superimposed by motion and other artifacts (TV-L1, NVIDIA). All optical maps contain residual illumination-related motion artifacts.

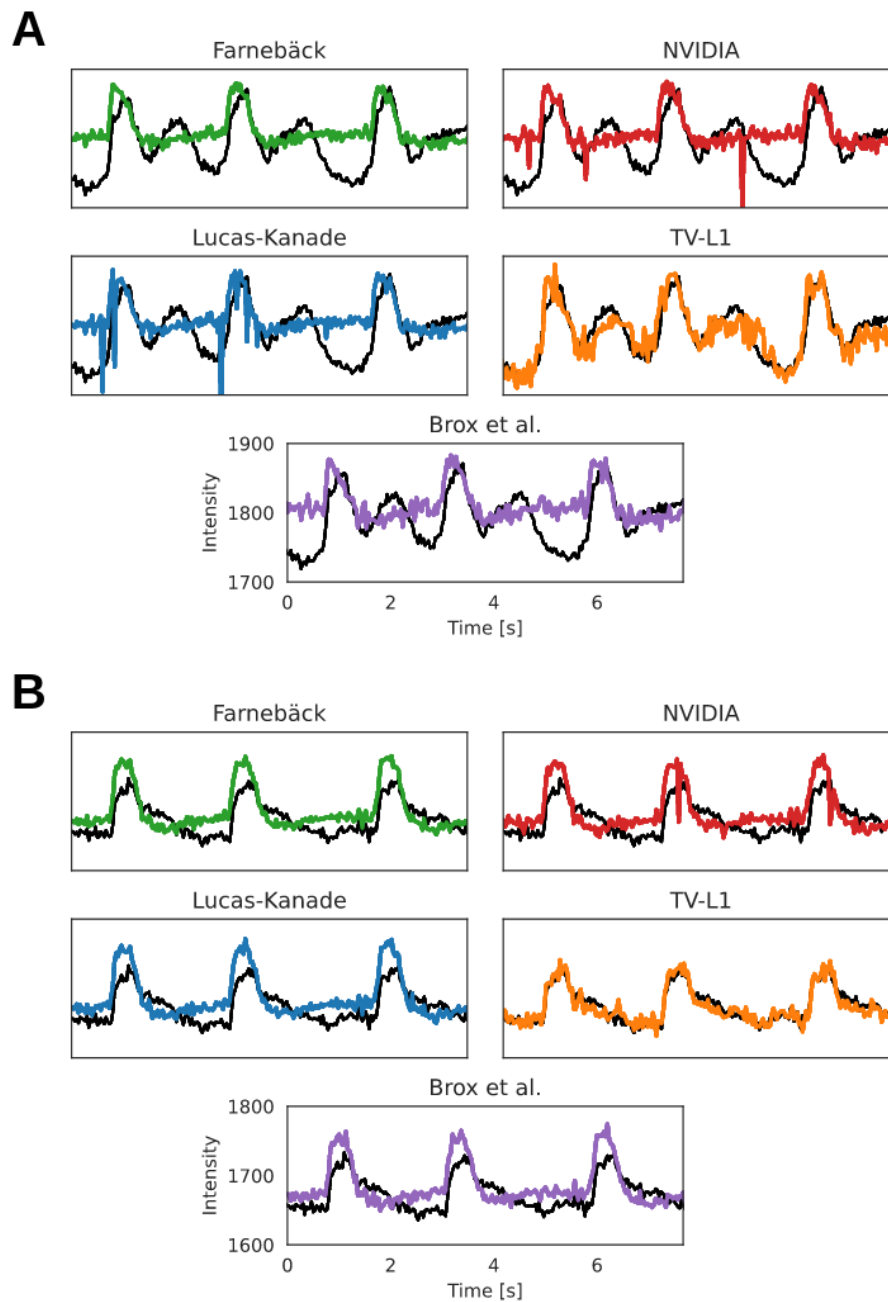

**Figure S7.** Comparison of motion-stabilized optical traces and optical maps obtained with 5 different GPU-based motion tracking algorithms imaging a strongly contracting and deforming cardiac cell culture (derived from hiPSC-CMs) with a IDS  $\mu$ Eye UI-3060CP-M-GL camera and voltage-sensitive fluorescent dye (FluoVolt), see also Supplementary Video 5. **A**) Optical traces obtained from the top (green) site shown in Fig. 6A,D), before (black) and after (colored) motion tracking and artifact compensation, c.f. left (green) trace in E). Residual illumination-related motion artifacts **B**) Optical traces obtained from the bottom (blue) site shown in Fig. 6A,D), before (black) and after (colored) motion tracking and artifact compensation, c.f. right (blue) trace in E).

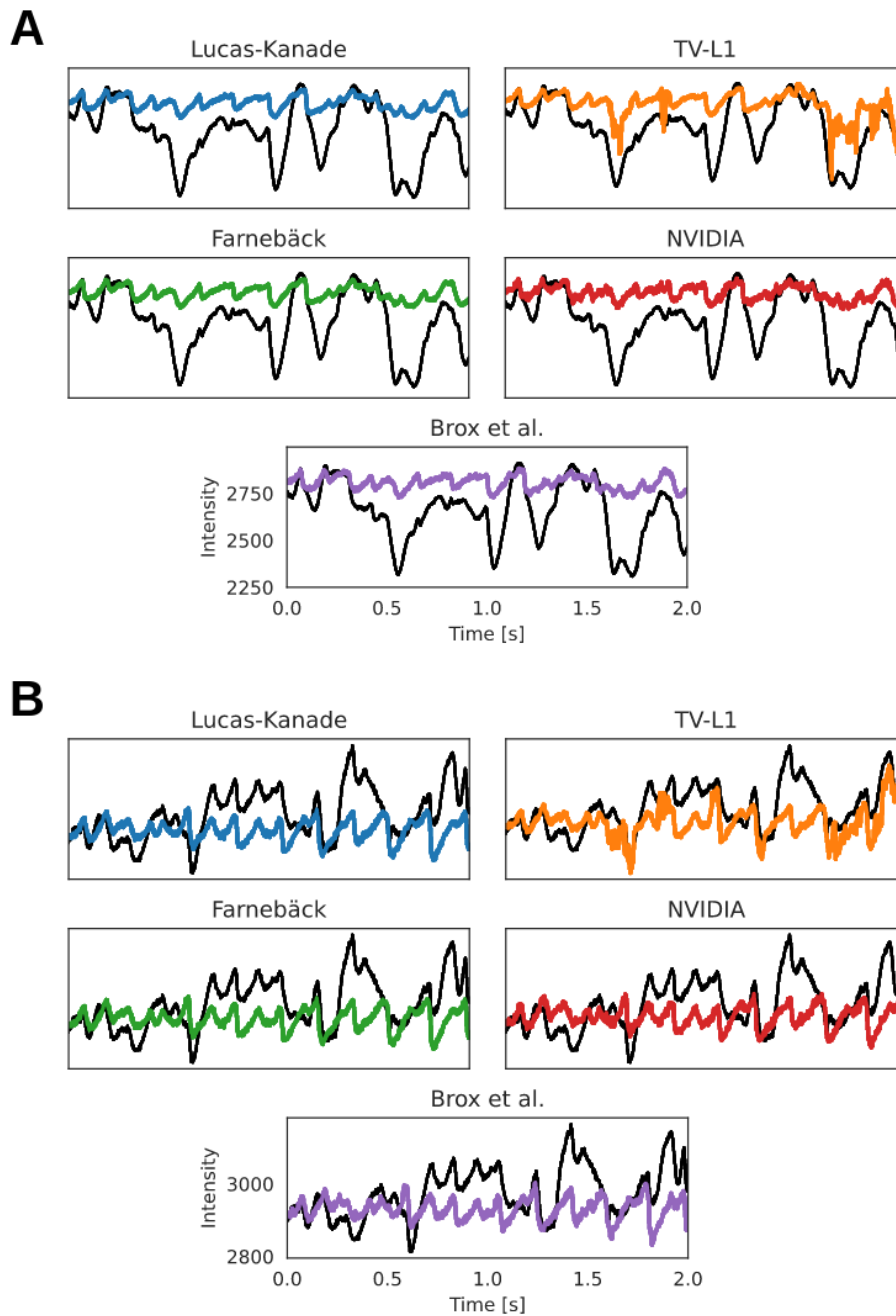

**Figure S8.** Comparison of motion-stabilized optical traces and optical maps obtained with 5 different GPU-based motion tracking algorithms imaging a beating rabbit heart during ventricular fibrillation with a Basler acA720-520um camera and voltage-sensitive fluorescent dye (Di-4-ANEPPS). **A)** Optical traces obtained from the top (green) site shown in Fig. 2A), before (black) and after (colored) motion tracking and artifact compensation, c.f. left (blue) trace in C). Residual illumination-related motion artifacts **B)** Optical traces obtained from the bottom (blue) site shown in Fig. 2A), before (black) and after (colored) motion tracking and artifact compensation, c.f. right (green) trace in C).
